# Supplementary material
Source: PubMed Central journal article supplement (PMC9378465)
Supplement: NIHMS1804020-supplement-Supplement.pdf [file NIHMS1804020-supplement-Supplement.pdf]

## Supplemental Appendix

**Supplement Table 1: Unadjusted Differences in Outcomes by ADRD and Proxy Status**

| % in top score                        | Non-Proxy |          | Proxy |          |
|---------------------------------------|-----------|----------|-------|----------|
|                                       | ADRD      | Non-ADRD | ADRD  | Non-ADRD |
| Overall rating of Care                | 39.3      | 42.6     | 30.7  | 36.7     |
| Overall rating of Plan                | 41.8      | 38.8     | 34.1  | 39.5     |
| Getting Needed Care                   | 37        | 49.5     | 41.5  | 43.8     |
| Getting Appointments and Care Quickly | 24        | 24.2     | 20.1  | 18.9     |
| Customer Service                      | 15.9      | 22.9     | 14.6  | 19.4     |
| Care Coordination                     | 22.2      | 29.5     | 21.3  | 26.9     |
| Getting Needed Prescriptions          | 59.4      | 69.3     | 60.3  | 65.8     |

**Supplement Table 2: Unadjusted Differences in Outcomes by ADRD Status- continuous variables**

| Mean Score               | Non-ADRD | ADRD |
|--------------------------|----------|------|
| Overall rating of Care   | 8.5      | 8.2  |
| Overall rating of plan   | 8.5      | 8.4  |
| Needed care index        | 84.2     | 80.5 |
| Timely care index        | 72.8     | 73.1 |
| Needed information index | 82.5     | 77.6 |
| Coordinated care index   | 81.9     | 77.5 |
| Get needed drugs index   | 93       | 90.9 |

**Supplement Table 3: Primary results including additional diagnoses from encounter claims**

| Percentage Point Difference for ADRD (95% CI) | Primary Results: Hospital, NH, and HH only | Hospital, NH, HH, and Encounter | Encounter Only         | Primary Analysis Excluding anyone with NH use |
|-----------------------------------------------|--------------------------------------------|---------------------------------|------------------------|-----------------------------------------------|
| <b>Proxy Response</b>                         |                                            |                                 |                        |                                               |
| Overall Rating of Care                        | -2.7 (-6.6 to 1.3)                         | -4.0* (-7.6 to -0.5)            | -6.0* (-11.0 to -1.0)  | -3.9 (-12.0 to 4.2)                           |
| Overall Rating of Plan                        | -3.8 (-7.8 to 0.2)                         | -2.9 (-6.5 to -0.8)             | -6.3* (-11.5 to -1.1)  | -5.5 (-13.8 to 2.8)                           |
| Getting Needed Care Index                     | -4.2* (-8.4 to 0.1)                        | -5.1** (-8.9 to -1.3)           | -5.8* (-11.2 to -0.4)  | -0.3 (-8.8 to 8.2)                            |
| Getting Appointments and Care Quickly Index   | -0.1 (-2.4 to 4.3)                         | 1.3 (-1.7 to 4.3)               | 2.3 (-1.9 to 6.6)      | -2.7 (-9.5 to 4.1)                            |
| Customer Service Index                        | -3.5* (-6.9 to -0.2)                       | -2.9 (-6.0 to 0.2)              | -3.7 (-8.1 to 0.7)     | -3.9 (-11.0 to 3.2)                           |
| Care Coordination Index                       | -0.1 (-4.6 to 2.5)                         | -1.2 (-4.4 to 0.2)              | 1.4 (-3.1 to 6.0)      | -2.3 (-9.6 to 5.0)                            |
| Getting Needed Prescription Index             | -2.4 (-6.3 to 2.5)                         | -2.6 (-6.2 to 0.1)              | -1.6 (-6.6 - 3.5)      | 5.8 (-2.2 to 13.8)                            |
| <b>Non-Proxy Response</b>                     |                                            |                                 |                        |                                               |
| Overall Rating of Care                        | 1.8 (-1.6 to 4.7)                          | 0.9 (0.2 to 4.0)                | -0.7 (-5.0 to 3.7)     | 4.4 (-2.5 to 11.3)                            |
| Overall Rating of Plan                        | 3.8* (0.5 to 7.2)                          | 2.2 (-0.9 to 5.3)               | 0.6 (-3.7 to 4.9)      | 5.3 (-1.5 to 12.1)                            |
| Getting Needed Care Index                     | -9.0** (-12.5 to -5.5)                     | -7.5** (-10.6 to -4.3)          | -8.3** (-12.7 to -3.9) | -14.4** (-21.4 to -7.4)                       |
| Getting Appointments and Care Quickly Index   | 1.4 (-1.6 to 4.3)                          | 0.5 (-2.2 to 3.1)               | -0.7 (-4.4 to 3.0)     | 4.4 (-1.5 to 10.3)                            |
| Customer Service Index                        | -8.5** (-11.5 to -5.4)                     | -7.2** (-9.9 to -4.5)           | -5.2** (-8.9 to -1.4)  | -6.6* (-12.8 to -0.5)                         |
| Care Coordination Index                       | 0.1 (-3.0 to 3.1)                          | -0.8 (-3.6 to 1.9)              | -4.2* (-8.1 to -0.3)   | -5.9 (-12.2 to 0.3)                           |
| Getting Needed Prescription Index             | -4.2* (-7.4 to -0.9)                       | -4.1** (-7.0 to 1.2)            | -2.3 (-6.4 to 1.8)     | 2.3 (-4.2 - 8.8)                              |

**Notes:** The first column include the primary results from our analysis which classifies ADRD on the basis of diagnoses in the hospital, nursing home, and home health settings. The second column additionally adds ADRD diagnoses from 2015 MA encounter data which includes outpatient sites of care. The third column only includes diagnoses that were recorded in the MA encounter data. The forth column excludes all residents that had a nursing home stay (including those who had an ADRD diagnosis in a nursing home setting) from the analysis.

**Supplement Table 4: Primary results using IPW to account for proxy status**

---

|                                       | Percentage point difference for ADRD from Non-ADRD,<br>weighting for proxy status |
|---------------------------------------|-----------------------------------------------------------------------------------|
| Outcome                               |                                                                                   |
| Percent in the Top Score Category     |                                                                                   |
| Overall Rating of Care                | -0.5 (-1.9 to 1.9)                                                                |
| Overall Rating of Plan                | -0.6 (-2.7 to 1.4)                                                                |
| Getting Needed Care                   | -5.0*** (-7.1 to -2.8)                                                            |
| Getting Appointments and Care Quickly | -0.0 (-1.7 to 1.7)                                                                |
| Customer Service                      | -3.8*** (-5.5 to -2.1)                                                            |
| Care Coordination                     | -1.9* (-3.7 to -0.0)                                                              |
| Getting Needed Prescriptions          | -2.2* (-4.3 to -0.1)                                                              |

---

**Notes:** Each regression model is weighed using inverse probability of proxy status weights calculated from a logit regression model which adjusts for proxy status.

**Supplement Table 5:** Care Experiences for Patients with ADRD in Dual Special Needs Plans and Non-Special Needs Plans, by Proxy Response

| Outcome                                     | Proxy Responses    |              |          |              |
|---------------------------------------------|--------------------|--------------|----------|--------------|
|                                             | No SNP             |              | Dual SNP |              |
| Overall Rating of Care                      | 35.4               | (32.1, 38.9) | 35.4     | (31.0, 39.9) |
| Overall Rating of Plan                      | 35.5               | (32.1, 38.9) | 39.9     | (35.4, 44.3) |
| Getting Needed Care Index                   | 42                 | (38.5, 45.5) | 36.9     | (32.3, 41.5) |
| Getting Appointments and Care Quickly Index | 19.3               | (16.5, 22.1) | 20       | (16.4, 23.7) |
| Customer Service Index                      | 16.7               | (13.9, 19.5) | 14.9     | (11.2, 18.5) |
| Care Coordination Index                     | 25.5               | (22.4, 28.6) | 22.9     | (18.8, 26.9) |
| Getting Needed Prescription Index           | 64.4               | (51.0, 68.1) | 61.2     | (56.8, 65.6) |
|                                             | Non-Proxy Response |              |          |              |
|                                             | No SNP             |              | Dual SNP |              |
| Overall Rating of Care                      | 42.8               | (39.6, 46.0) | 43.7     | (37.9, 49.6) |
| Overall Rating of Plan                      | 42.7               | (39.6, 45.9) | 36.7***  | (31.1, 42.3) |
| Getting Needed Care Index                   | 39.5               | (36.3, 42.8) | 39.6     | (33.8, 45.4) |
| Getting Appointments and Care Quickly Index | 25.1               | (22.2, 27.9) | 27.7     | (22.8, 32.8) |
| Customer Service Index                      | 15.6               | (12.9, 18.4) | 15.5     | (10.5, 20.3) |
| Care Coordination Index                     | 28.9               | (25.9, 31.9) | 22.4     | (17.1, 27.8) |
| Getting Needed Prescription Index           | 64.1               | (61.1, 67.1) | 57.6     | (52.2, 63.0) |

**Notes:** All data in this table are from enrollees who were classified as having ADRD. The top section of the table is for enrollees who had a proxy respond for them, and the bottom section of the table is for beneficiaries who did not use a proxy. All means are adjusted marginal means from a linear regression model adjusting for gender, race/ethnicity, rurality, education, reason for eligibility, plan premium, plan rating, plan type (HMO, PPO, Other), plan national or local status, plan health system affiliation, and county fixed effects. 95% CI are in parentheses. Aside from disenrollment, all outcomes are binary variables of whether the beneficiary reported in the top scoring category of each index (100). \* denotes <0.05 \*\* <0.01 \*\*\* <0.001

**Supplemental Table 6a: Full Regression Coefficients for Primary Analysis, Proxy Responses**

| VARIABLES           | Overall Rating of Care       | Overall Rating of Plan      | Getting Needed Care          | Getting Appointments and Care Quickly | Customer Service            | Care Coordination          | Getting Needed Prescriptions |
|---------------------|------------------------------|-----------------------------|------------------------------|---------------------------------------|-----------------------------|----------------------------|------------------------------|
| ADRD                | -0.027<br>(-0.066 - 0.013)   | -0.038<br>(-0.078 - 0.002)  | -0.042*<br>(-0.084 - 0.001)  | 0.010<br>(-0.024 - 0.043)             | -0.035*<br>(-0.069 - 0.002) | -0.010<br>(-0.046 - 0.025) | -0.024<br>(-0.063 - 0.016)   |
| Dual                | 0.002<br>(-0.034 - 0.037)    | 0.058**<br>(0.021 - 0.094)  | -0.017<br>(-0.055 - 0.021)   | 0.013<br>(-0.017 - 0.043)             | 0.007<br>(-0.023 - 0.038)   | -0.018<br>(-0.050 - 0.015) | -0.049**<br>(-0.085 - 0.014) |
| race= Black         | 0.023<br>(-0.026 - 0.072)    | 0.032<br>(-0.018 - 0.082)   | 0.026<br>(-0.026 - 0.078)    | 0.037<br>(-0.005 - 0.078)             | -0.028<br>(-0.070 - 0.014)  | 0.060**<br>(0.016 - 0.104) | -0.001<br>(-0.050 - 0.048)   |
| race= other/unknown | 0.020<br>(-0.090 - 0.129)    | 0.037<br>(-0.075 - 0.149)   | -0.015<br>(-0.131 - 0.101)   | -0.091<br>(-0.184 - 0.002)            | 0.013<br>(-0.081 - 0.108)   | -0.003<br>(-0.103 - 0.096) | -0.063<br>(-0.173 - 0.046)   |
| Race=Asian          | -0.040<br>(-0.111 - 0.031)   | -0.053<br>(-0.126 - 0.019)  | -0.094*<br>(-0.169 - 0.018)  | -0.062*<br>(-0.122 - 0.002)           | -0.042<br>(-0.104 - 0.019)  | -0.052<br>(-0.116 - 0.012) | -0.096**<br>(-0.168 - 0.025) |
| Race=Hispanic       | 0.073**<br>(0.026 - 0.120)   | 0.120**<br>(0.073 - 0.168)  | -0.019<br>(-0.069 - 0.031)   | 0.001<br>(-0.039 - 0.041)             | 0.007<br>(-0.034 - 0.047)   | 0.003<br>(-0.040 - 0.045)  | -0.026<br>(-0.073 - 0.021)   |
| Race=NA/AI          | -0.131<br>(-0.387 - 0.125)   | 0.047<br>(-0.214 - 0.309)   | 0.015<br>(-0.256 - 0.287)    | 0.083<br>(-0.134 - 0.299)             | -0.029<br>(-0.250 - 0.192)  | 0.205<br>(-0.027 - 0.436)  | 0.042<br>(-0.215 - 0.298)    |
| Female              | -0.036**<br>(-0.062 - 0.011) | -0.031*<br>(-0.057 - 0.005) | 0.008<br>(-0.019 - 0.034)    | 0.009<br>(-0.012 - 0.031)             | -0.016<br>(-0.038 - 0.006)  | 0.006<br>(-0.017 - 0.029)  | 0.007<br>(-0.018 - 0.032)    |
| 2-2.5 stars         | -0.012<br>(-0.123 - 0.098)   | 0.016<br>(-0.096 - 0.129)   | -0.062<br>(-0.179 - 0.055)   | 0.061<br>(-0.032 - 0.155)             | -0.043<br>(-0.138 - 0.052)  | 0.049<br>(-0.051 - 0.149)  | 0.009<br>(-0.102 - 0.119)    |
| 3-3.5 stars         | 0.003<br>(-0.062 - 0.069)    | 0.005<br>(-0.062 - 0.072)   | -0.045<br>(-0.114 - 0.025)   | 0.041<br>(-0.015 - 0.096)             | -0.038<br>(-0.094 - 0.019)  | 0.034<br>(-0.026 - 0.093)  | -0.015<br>(-0.081 - 0.051)   |
| 4-4.5 stars         | 0.028<br>(-0.037 - 0.093)    | 0.080*<br>(0.013 - 0.146)   | 0.003<br>(-0.066 - 0.072)    | 0.051<br>(-0.004 - 0.106)             | 0.005<br>(-0.051 - 0.061)   | 0.029<br>(-0.030 - 0.087)  | 0.030<br>(-0.035 - 0.095)    |
| 5 stars             | 0.079<br>(-0.011 - 0.169)    | 0.175**<br>(0.084 - 0.267)  | 0.046<br>(-0.049 - 0.141)    | 0.091*<br>(0.015 - 0.167)             | 0.014<br>(-0.063 - 0.091)   | 0.065<br>(-0.016 - 0.147)  | 0.038<br>(-0.052 - 0.128)    |
| Any hospital use    | -0.014<br>(-0.044 - 0.016)   | 0.019<br>(-0.011 - 0.049)   | 0.006<br>(-0.025 - 0.037)    | -0.010<br>(-0.035 - 0.015)            | 0.002<br>(-0.023 - 0.028)   | -0.003<br>(-0.030 - 0.024) | 0.025<br>(-0.004 - 0.055)    |
| Any MDS use         | -0.010<br>(-0.040 - 0.020)   | -0.021<br>(-0.052 - 0.010)  | 0.001<br>(-0.031 - 0.033)    | -0.017<br>(-0.043 - 0.009)            | -0.019<br>(-0.045 - 0.008)  | -0.025<br>(-0.053 - 0.002) | -0.046**<br>(-0.076 - 0.015) |
| Any HH use          | -0.041**<br>(-0.068 - 0.014) | -0.014<br>(-0.042 - 0.014)  | -0.043**<br>(-0.072 - 0.015) | -0.016<br>(-0.039 - 0.007)            | 0.025*<br>(0.002 - 0.049)   | -0.011<br>(-0.036 - 0.013) | 0.022<br>(-0.005 - 0.049)    |
| Dual SNP            | -0.041                       | 0.034                       | 0.077                        | -0.040                                | 0.062                       | 0.047                      | 0.009                        |

|                              |                                 |                               |                               |                                |                               |                               |                                |
|------------------------------|---------------------------------|-------------------------------|-------------------------------|--------------------------------|-------------------------------|-------------------------------|--------------------------------|
|                              | (-0.129 -<br>0.047)             | (-0.056 -<br>0.124)           | (-0.017 -<br>0.171)           | (-0.115 -<br>0.035)            | (-0.014 -<br>0.138)           | (-0.033 -<br>0.127)           | (-0.079 -<br>0.098)            |
| CSNP                         | 0.004<br>(-0.043 -<br>0.050)    | 0.059*<br>(0.012 -<br>0.106)  | -0.016<br>(-0.066 -<br>0.033) | -0.003<br>(-0.042 -<br>0.037)  | 0.022<br>(-0.019 -<br>0.062)  | 0.014<br>(-0.028 -<br>0.056)  | -0.006<br>(-0.053 -<br>0.040)  |
| ISNP                         | -0.191<br>(-0.740 -<br>0.359)   | 0.087<br>(-0.474 -<br>0.648)  | -0.109<br>(-0.693 -<br>0.474) | 0.146<br>(-0.319 -<br>0.611)   | -0.199<br>(-0.673 -<br>0.275) | 0.163<br>(-0.334 -<br>0.660)  | -0.590*<br>(-1.141 -<br>0.040) |
| PPO                          | -0.060**<br>(-0.102 -<br>0.019) | -0.033<br>(-0.075 -<br>0.009) | 0.012<br>(-0.032 -<br>0.056)  | -0.036*<br>(-0.071 -<br>0.001) | -0.013<br>(-0.049 -<br>0.022) | -0.031<br>(-0.068 -<br>0.007) | -0.047*<br>(-0.089 -<br>0.006) |
| Other                        | 0.030<br>(-0.030 -<br>0.090)    | 0.007<br>(-0.054 -<br>0.068)  | -0.014<br>(-0.077 -<br>0.050) | -0.022<br>(-0.073 -<br>0.028)  | 0.001<br>(-0.050 -<br>0.053)  | 0.009<br>(-0.045 -<br>0.063)  | -0.013<br>(-0.073 -<br>0.047)  |
| Zero Premium                 | -0.022<br>(-0.062 -<br>0.019)   | 0.009<br>(-0.032 -<br>0.050)  | 0.006<br>(-0.037 -<br>0.049)  | -0.029<br>(-0.064 -<br>0.005)  | 0.009<br>(-0.026 -<br>0.044)  | -0.013<br>(-0.049 -<br>0.024) | 0.014<br>(-0.027 -<br>0.054)   |
| Premium                      | 0.000<br>(-0.000 -<br>0.000)    | 0.000<br>(-0.000 -<br>0.001)  | 0.000<br>(-0.000 -<br>0.001)  | -0.000<br>(-0.000 -<br>0.000)  | -0.000<br>(-0.000 -<br>0.000) | 0.000<br>(-0.000 -<br>0.000)  | 0.000<br>(-0.000 -<br>0.001)   |
| For-profit contract          | 0.049*<br>(0.008 -<br>0.089)    | 0.038<br>(-0.003 -<br>0.080)  | 0.019<br>(-0.024 -<br>0.062)  | 0.011<br>(-0.024 -<br>0.045)   | 0.023<br>(-0.012 -<br>0.057)  | 0.049**<br>(0.012 -<br>0.086) | 0.009<br>(-0.031 -<br>0.050)   |
| Health System<br>Affiliation | 0.054*<br>(0.000 -<br>0.107)    | 0.036<br>(-0.019 -<br>0.091)  | 0.067*<br>(0.010 -<br>0.124)  | 0.022<br>(-0.023 -<br>0.067)   | 0.040<br>(-0.006 -<br>0.086)  | -0.022<br>(-0.071 -<br>0.026) | 0.022<br>(-0.032 -<br>0.075)   |
| National contract            | -0.012<br>(-0.055 -<br>0.030)   | -0.040<br>(-0.083 -<br>0.003) | -0.030<br>(-0.075 -<br>0.015) | -0.009<br>(-0.045 -<br>0.026)  | -0.029<br>(-0.065 -<br>0.008) | -0.037<br>(-0.075 -<br>0.001) | 0.007<br>(-0.035 -<br>0.049)   |
| Constant                     | 0.348**<br>(0.265 -<br>0.430)   | 0.262**<br>(0.178 -<br>0.346) | 0.491**<br>(0.403 -<br>0.578) | 0.169**<br>(0.099 -<br>0.239)  | 0.216**<br>(0.144 -<br>0.287) | 0.208**<br>(0.133 -<br>0.282) | 0.640**<br>(0.558 -<br>0.723)  |
| R-squared                    | 0.188                           | 0.188                         | 0.175                         | 0.169                          | 0.177                         | 0.180                         | 0.178                          |

**Supplemental Table 6b: Full Regression Coefficients for Primary Analysis, Non-Proxy Responses**

| VARIABLES           | Overall Rating of Care        | Overall Rating of Plan     | Getting Needed Care           | Non-Proxy Getting Appointments and Care Quickly | Customer Service              | Care Coordination            | Getting Needed Prescriptions  |
|---------------------|-------------------------------|----------------------------|-------------------------------|-------------------------------------------------|-------------------------------|------------------------------|-------------------------------|
| ADRD                | 0.018<br>(-0.016 - 0.053)     | 0.038*<br>(0.005 - 0.072)  | -0.090**<br>(-0.125 - -0.055) | 0.014<br>(-0.016 - 0.043)                       | -0.085**<br>(-0.115 - -0.054) | 0.001<br>(-0.030 - 0.031)    | -0.042*<br>(-0.074 - -0.009)  |
| Dual                | -0.000<br>(-0.018 - 0.017)    | 0.059**<br>(0.042 - 0.077) | -0.045**<br>(-0.063 - -0.028) | -0.001<br>(-0.016 - 0.014)                      | 0.006<br>(-0.010 - 0.021)     | -0.016*<br>(-0.032 - 0.001)  | -0.012<br>(-0.028 - 0.005)    |
| race= Black         | -0.018<br>(-0.039 - 0.002)    | 0.018<br>(-0.002 - 0.038)  | -0.036**<br>(-0.056 - -0.015) | 0.035**<br>(0.017 - 0.052)                      | 0.045**<br>(0.027 - 0.063)    | 0.046**<br>(0.028 - 0.064)   | -0.017<br>(-0.036 - 0.002)    |
| race= other/unknown | -0.055*<br>(-0.100 - -0.010)  | -0.003<br>(-0.047 - 0.041) | -0.009<br>(-0.054 - 0.037)    | -0.031<br>(-0.070 - 0.007)                      | 0.010<br>(-0.029 - 0.050)     | -0.028<br>(-0.068 - 0.013)   | -0.060**<br>(-0.103 - -0.018) |
| Race=Asian          | -0.102**<br>(-0.147 - -0.057) | -0.005<br>(-0.049 - 0.039) | -0.133**<br>(-0.179 - -0.088) | -0.062**<br>(-0.100 - -0.023)                   | -0.045*<br>(-0.084 - -0.005)  | -0.029<br>(-0.069 - 0.011)   | -0.106**<br>(-0.148 - -0.064) |
| Race=Hispanic       | 0.069**<br>(0.044 - 0.093)    | 0.109**<br>(0.085 - 0.133) | -0.031*<br>(-0.056 - 0.006)   | 0.058**<br>(0.037 - 0.079)                      | 0.021<br>(-0.000 - 0.043)     | -0.007<br>(-0.029 - 0.014)   | -0.059**<br>(-0.082 - -0.036) |
| Race=NA/Al          | -0.012<br>(-0.128 - 0.105)    | 0.003<br>(-0.112 - 0.118)  | 0.013<br>(-0.105 - 0.132)     | 0.032<br>(-0.068 - 0.132)                       | 0.087<br>(-0.016 - 0.191)     | 0.100<br>(-0.004 - 0.204)    | -0.085<br>(-0.195 - 0.025)    |
| Female              | 0.035**<br>(0.024 - 0.046)    | 0.024**<br>(0.014 - 0.035) | -0.027**<br>(-0.038 - -0.016) | -0.004<br>(-0.014 - 0.005)                      | 0.000<br>(-0.009 - 0.010)     | -0.012*<br>(-0.022 - 0.003)  | 0.003<br>(-0.007 - 0.013)     |
| 2-2.5 stars         | 0.054*<br>(0.004 - 0.104)     | 0.055*<br>(0.006 - 0.104)  | 0.019<br>(-0.032 - 0.070)     | 0.012<br>(-0.031 - 0.055)                       | 0.031<br>(-0.013 - 0.075)     | 0.028<br>(-0.017 - 0.073)    | 0.069**<br>(0.022 - 0.116)    |
| 3-3.5 stars         | 0.018<br>(-0.009 - 0.045)     | 0.009<br>(-0.018 - 0.035)  | 0.017<br>(-0.011 - 0.044)     | 0.003<br>(-0.020 - 0.027)                       | -0.020<br>(-0.044 - 0.004)    | 0.008<br>(-0.016 - 0.032)    | 0.028*<br>(0.003 - 0.054)     |
| 4-4.5 stars         | 0.047**<br>(0.021 - 0.074)    | 0.058**<br>(0.032 - 0.084) | 0.038**<br>(0.011 - 0.065)    | 0.013<br>(-0.010 - 0.036)                       | -0.004<br>(-0.028 - 0.019)    | 0.012<br>(-0.012 - 0.035)    | 0.039**<br>(0.013 - 0.064)    |
| 5 stars             | 0.094**<br>(0.057 - 0.131)    | 0.140**<br>(0.103 - 0.177) | 0.076**<br>(0.039 - 0.114)    | 0.073**<br>(0.041 - 0.105)                      | 0.012<br>(-0.020 - 0.045)     | 0.031<br>(-0.002 - 0.064)    | 0.079**<br>(0.044 - 0.114)    |
| Any hospital use    | 0.005<br>(-0.011 - 0.020)     | 0.002<br>(-0.014 - 0.017)  | 0.041**<br>(0.025 - 0.057)    | 0.009<br>(-0.005 - 0.022)                       | 0.018**<br>(0.005 - 0.032)    | 0.004<br>(-0.010 - 0.018)    | 0.024**<br>(0.009 - 0.039)    |
| Any MDS use         | -0.007<br>(-0.021 - 0.006)    | -0.004<br>(-0.018 - 0.009) | -0.031**<br>(-0.044 - -0.017) | -0.005<br>(-0.017 - 0.006)                      | -0.008<br>(-0.020 - 0.004)    | -0.025**<br>(-0.037 - 0.013) | -0.028**<br>(-0.041 - -0.016) |
| Any HH use          | -0.023**                      | 0.002                      | -0.018**                      | 0.000                                           | -0.008                        | -0.023**                     | -0.010                        |



|                              |                                  |                                  |                                   |                            |                                 |                               |                                   |
|------------------------------|----------------------------------|----------------------------------|-----------------------------------|----------------------------|---------------------------------|-------------------------------|-----------------------------------|
|                              | (-0.035 -<br>0.011)              | (-0.010 -<br>0.014)              | (-0.030 - -<br>0.006)             | (-0.010 - 0.010)           | (-0.018 -<br>0.003)             | (-0.034 - -<br>0.013)         | (-0.021 -<br>0.002)               |
| Dual SNP                     | -0.022<br>(-0.059 -<br>0.016)    | 0.010<br>(-0.027 -<br>0.047)     | 0.016<br>(-0.022 -<br>0.054)      | 0.006<br>(-0.026 - 0.038)  | 0.029<br>0.062                  | -0.004<br>(-0.037 -<br>0.030) | 0.003<br>(-0.032 -<br>0.039)      |
| CSNP                         | -0.001<br>(-0.025 -<br>0.023)    | 0.057**<br>(0.033 -<br>0.081)    | 0.001<br>(-0.024 -<br>0.025)      | 0.021<br>(-0.000 - 0.041)  | 0.030**<br>(0.008 -<br>0.051)   | -0.000<br>(-0.022 -<br>0.021) | -0.009<br>(-0.032 -<br>0.013)     |
| ISNP                         | -0.084<br>(-0.389 -<br>0.222)    | -0.071<br>(-0.372 -<br>0.230)    | -0.229<br>(-0.539 -<br>0.081)     | -0.115<br>(-0.377 - 0.147) | -0.041<br>(-0.311 -<br>0.229)   | -0.124<br>(-0.397 -<br>0.149) | -0.211<br>(-0.499 -<br>0.077)     |
| PPO                          | -0.004<br>(-0.020 -<br>0.013)    | -0.007<br>(-0.024 -<br>0.009)    | 0.017<br>(-0.000 -<br>0.033)      | -0.010<br>(-0.024 - 0.004) | 0.001<br>0.016                  | 0.006<br>(-0.009 -<br>0.020)  | 0.004<br>(-0.011 -<br>0.020)      |
| Other                        | -0.029*<br>(-0.053 - -<br>0.004) | -0.025*<br>(-0.050 - -<br>0.001) | -0.053**<br>(-0.078 - -<br>0.028) | -0.013<br>(-0.034 - 0.008) | -0.028*<br>(-0.050 -<br>-0.007) | 0.013<br>(-0.008 -<br>0.035)  | 0.009<br>(-0.015 -<br>0.032)      |
| Zero Premium                 | -0.010<br>(-0.027 -<br>0.007)    | -0.006<br>(-0.022 -<br>0.011)    | -0.015<br>(-0.032 -<br>0.002)     | 0.003<br>(-0.012 - 0.018)  | 0.001<br>0.016                  | -0.013<br>(-0.028 -<br>0.003) | 0.012<br>(-0.004 -<br>0.028)      |
| Premium                      | -0.000<br>(-0.000 -<br>0.000)    | 0.000<br>(-0.000 -<br>0.000)     | -0.000<br>(-0.000 -<br>0.000)     | 0.000<br>(-0.000 - 0.000)  | -0.000<br>0.000                 | -0.000<br>(-0.000 -<br>0.000) | 0.000<br>(-0.000 -<br>0.000)      |
| For-profit<br>contract       | 0.011<br>(-0.006 -<br>0.028)     | -0.013<br>(-0.030 -<br>0.003)    | -0.017*<br>(-0.034 - -<br>0.000)  | 0.006<br>(-0.008 - 0.021)  | -0.008<br>(-0.023 -<br>0.007)   | 0.006<br>(-0.009 -<br>0.021)  | -0.022**<br>(-0.038 - -<br>0.006) |
| Health System<br>Affiliation | 0.025*<br>(0.003 -<br>0.047)     | 0.028*<br>(0.007 -<br>0.050)     | 0.002<br>(-0.020 -<br>0.024)      | 0.006<br>(-0.012 - 0.025)  | 0.028**<br>(0.009 -<br>0.048)   | 0.017<br>(-0.002 -<br>0.037)  | 0.012<br>(-0.008 -<br>0.033)      |
| National<br>contract         | -0.006<br>(-0.023 -<br>0.011)    | 0.011<br>(-0.005 -<br>0.028)     | -0.005<br>(-0.022 -<br>0.013)     | -0.001<br>(-0.016 - 0.013) | 0.011<br>0.026                  | -0.009<br>(-0.024 -<br>0.007) | -0.002<br>(-0.018 -<br>0.014)     |
| Constant                     | 0.345**<br>(0.310 -<br>0.380)    | 0.299**<br>(0.264 -<br>0.333)    | 0.510**<br>(0.475 -<br>0.546)     | 0.200**<br>(0.170 - 0.230) | 0.238**<br>(0.207 -<br>0.269)   | 0.265**<br>(0.233 -<br>0.296) | 0.651**<br>(0.618 - 0.684)        |
| R-squared                    | 0.058                            | 0.077                            | 0.068                             | 0.061                      | 0.059                           | 0.063                         | 0.064                             |
